# Autoimmune Gastropathy in Type 1 Diabetic Patients With Parietal Cell Antibodies

## Histological and clinical findings

CHRISTOPHE E.M. DE BLOCK, MD, PHD<sup>1</sup>  
IVO H. DE LEEUW, MD, PHD<sup>1</sup>  
JOHANNES J.P.M. BOGERS, MD, PHD<sup>2</sup>  
PAUL A. PELCKMANS, MD, PHD<sup>3</sup>

MARGARETA M. IJVEN, PHARM, PHD<sup>4</sup>  
ERIC A.E. VAN MARCK, MD, PHD<sup>2</sup>  
KRISTIEN L. VAN ACKER, MD, PHD<sup>1</sup>  
LUC F. VAN GAAL, MD, PHD<sup>1</sup>

**OBJECTIVE** — Approximately 15–20% of type 1 diabetic patients exhibit parietal cell antibodies (PCAs) targeting gastric H<sup>+</sup>/K<sup>+</sup>ATPase. We examined whether iron deficiency anemia, pernicious anemia, and autoimmune gastritis, which may predispose to gastric tumors, were more frequent in PCA<sup>+</sup> than in PCA<sup>-</sup> patients.

**RESEARCH DESIGN AND METHODS** — Gastric biopsies from 88 consecutively recruited type 1 diabetic patients (51 men and 37 women, 47 PCA<sup>+</sup> and 41 PCA<sup>-</sup>, aged 42 ± 13 years) were evaluated using the updated Sydney system. Immunostaining was done for parietal cells, B- and T-cells, enterochromaffin-like (ECL) cells, and *Helicobacter pylori* (HP). PCAs were assayed by indirect immunofluorescence, H<sup>+</sup>/K<sup>+</sup>ATPase antibodies by enzyme immunoassay, and HP by serology, urea breath test, and histology. Pentagastrin tests were performed in 42 subjects.

**RESULTS** — Autoimmune gastritis (AG) was present in 57% of PCA<sup>+</sup> and 10% of PCA<sup>-</sup> cases (OR 12.5,  $P < 0.0001$ ). PCA positivity ( $\beta = 1.44$ ;  $P = 0.04$ ) and hypergastrinemia ( $\beta = 0.01$ ;  $P = 0.026$ ), but not HP, age, diabetes duration, sex, and HLA-DQ type were risk factors for AG. Iron deficiency anemia (OR 3.9,  $P = 0.015$ ), pernicious anemia (OR = 4.6,  $P = 0.022$ ), and hypochlorhydria (OR = 20.0,  $P = 0.0002$ ) were more frequent in AG<sup>+</sup> individuals. HP infection was present in 47 patients but did not influence corpus histology or gastrinemia. (Pre)malignant lesions were found in 26% of PCA<sup>+</sup> subjects: ECL cell hyperplasia in 7 AG<sup>+</sup> patients, comprising 1 with a gastric carcinoid tumor, and corpus intestinal metaplasia in 11 AG<sup>+</sup> patients, including 1 with linitis plastica.

**CONCLUSIONS** — PCA<sup>+</sup> type 1 diabetic patients should be screened for autoimmune gastritis, iron deficiency, and pernicious anemia. Particularly hypergastrinemic PCA<sup>+</sup> patients with autoimmune gastritis are at increased risk for (pre)malignant gastric lesions.

*Diabetes Care* 26:82–88, 2003

Type 1 diabetes results from autoimmune destruction of insulin-secreting  $\beta$ -cells (1). Moreover, 15–20% of patients exhibit parietal cell antibodies (PCAs) (2–4), particularly subjects with GAD-65 antibodies and HLA-DQA1\*0501-B1\*0301 haplotype (5). PCAs are two to three times more fre-

quent in these patients than in control subjects (2–4). PCAs target gastric H<sup>+</sup>/K<sup>+</sup>ATPase (6,7) and denote autoimmune gastritis (8–10). Chronic autoaggression to the proton pump may result in hypo/achlorhydria, hypergastrinemia, and iron deficiency anemia (11–14). PCAs may also inhibit intrinsic factor secretion, leading to pernicious anemia, which is 10 times more common in type 1 diabetic than in nondiabetic subjects (15,16). Pernicious anemia and autoimmune gastritis may predispose to gastric tumors (17–22), although this has not been consistently observed (23). Gastric adenocarcinomas develop in 1–10% of subjects with autoimmune gastritis through intestinal meta/dysplasia (17–19). Carcinoid tumors develop in 4–7% of these subjects on a background of enterochromaffin-like (ECL) cell hyperplasia induced by sustained pronounced hypergastrinemia (20,21). Recently, *Helicobacter pylori* (HP) has been suggested to induce autoimmune gastritis (24–26).

Determining risk factors for and early diagnosis of autoimmune gastropathy is important for the prevention/treatment of iron deficiency anemia, pernicious anemia, and (pre)malignant gastric lesions (intestinal meta/dysplasia and ECL hyper/dysplasia). To our knowledge, we are the first to study the prevalence of autoimmune gastropathy in relation to PCAs, HP, gastrinemia, HLA-DQ type, age, sex, and diabetes duration. We evaluated a combination of histological parameters using the updated Sydney system (27) and criteria for preatrophic autoimmune gastritis (28), with specific attention for parietal cell mass (29,30), HP, mucosal B- and T-cells (9), ECL cells (20), and intestinal metaplasia (27).

## RESEARCH DESIGN AND METHODS

We studied 88 type 1 diabetic patients (51 men and 37 women), comprising 47 PCA<sup>+</sup> and 41 PCA<sup>-</sup> subjects matched for

From the <sup>1</sup>Department of Endocrinology-Diabetology, Faculty of Medicine, University of Antwerp, University Hospital Antwerp, Edegem, Belgium; the <sup>2</sup>Department of Pathology, Faculty of Medicine, University of Antwerp, University Hospital Antwerp, Edegem, Belgium; the <sup>3</sup>Department of Gastroenterology and Hepatology, Faculty of Medicine, University of Antwerp, University Hospital Antwerp, Edegem, Belgium; and the <sup>4</sup>Department of Microbiology, Faculty of Medicine, University of Antwerp, University Hospital Antwerp, Edegem, Belgium.

Address correspondence and reprint requests to Dr. Christophe De Block, Department of Endocrinology-Diabetology, University Hospital Antwerp, Wilrijkstraat 10, B-2650 Edegem, Belgium. E-mail: cdeblock@uia.ua.ac.be.

Received for publication 22 May 2002 and accepted in revised form 18 August 2002.

**Abbreviations:** AG, autoimmune gastritis; AIF, antibodies to intrinsic factor; ECL, enterochromaffin-like; GADA, GAD antibody; HP, *Helicobacter pylori*; PCA, parietal cell antibody.

A table elsewhere in this issue shows conventional and Système International (SI) units and conversion factors for many substances.

age, sex, duration of diabetes, and metabolic control. They were consecutively recruited according to PCA status irrespective of symptoms from 399 patients (75 PCA<sup>+</sup> and 324 PCA<sup>-</sup>) attending the outpatient Antwerp University diabetes clinic. All together, 63% (47 of 75) of all PCA<sup>+</sup> patients and 37% (41 of 110) of all eligible, matched PCA<sup>-</sup> patients agreed to undergo gastroscopy. Every patient fulfilled the criteria of type 1 diabetes (31). No patient used antibiotics, anti-inflammatories, prokinetics, or proton pump inhibitors or had Crohn's disease, colitis ulcerosa, celiac disease, systemic lupus erythematosus, or rheumatoid arthritis. The study was approved by the local ethics committee. Each subject gave informed consent, in accordance with the Helsinki Declaration.

## Methods

Islet cell antibodies (ICAs, normal level <12 Juvenile Diabetes Foundation units) were determined by indirect immunofluorescence on cryosections of human donor pancreas, GAD-65 antibodies (GADAs) (normal level <2.6% tracer bound), and tyrosine phosphatase (IA2 antigen, normal level <0.5% tracer bound) by liquid-phase radiobinding assay using Centricon-purified recombinant human <sup>35</sup>S-GAD65 and the <sup>35</sup>S-labeled intracellular domain of IA2 as tracer (32), respectively. PCAs were detected using indirect immunofluorescence on rat gastric mucosa (Medical Diagnostics California, Carlsbad, CA) (normal level <1/20 dilution) (3). This assay correlated well with the enzyme immunoassay for H<sup>+</sup>/K<sup>+</sup>ATPase antibodies (Varellisa, Pharmacia and Upjohn, Freiburg, Germany) (normal level <10 units/ml) ( $n = 175$ ,  $r = 0.85$ ,  $P < 0.0001$ ). Antibodies to intrinsic factor (AIF) were measured by radiobinding assay (Diagnostic Products, Los Angeles, CA) (normal level <1.1). Iron deficiency anemia was defined as microcytic hypochromic anemia with a transferrin saturation  $\leq 20\%$  or a decreased iron (male < 8.95, female < 7.16  $\mu\text{mol/l}$ ) or ferritin level (male < 20, female < 12  $\mu\text{g/l}$ ) (13). Pernicious anemia was defined as macrocytic anemia, subnormal vitamin B12 levels, with positive AIF and/or PCA. Serum gastrin was measured by radioimmunoassay technique (Euro-Diagnostics, Malmö, Sweden) (normal level <110 ng/l), vitamin B12 (normal level 120–715 pmol/l),

and erythrocyte folate levels (normal level 270–1950 nmol/l) using Simultrac-SNB RIA kit (ICN, Orangeburg, NY). HLA-DQ typing was performed as previously described (33).

Serum was assayed for HP IgG antibodies by enzyme-linked immunosorbent assay (Roche Diagnostics, Brussels, Belgium). <sup>13</sup>C Urea breath tests were performed as previously described (34). Antrum, corpus, and fundus biopsies were examined for HP colonization using modified Giemsa and/or immunostaining (35). HP infection was diagnosed if any test was positive. The period between urea breath test and gastroscopy was maximally 14 days.

Gastric acid secretion studies were performed in 42 patients (15 PCA<sup>+</sup> and 27 PCA<sup>-</sup>) after a 12-h overnight fast using pentagastrin-stimulated acid output (6  $\mu\text{g/kg}$  s.c. Pentagastrin Injection BP; Cambridge Laboratories, Newcastle upon Tyne, U.K.) (35). Hypochlorhydria was defined as a maximal acid output <15 mmol H<sup>+</sup>/h.

## Gastroscopy and histology

At upper gastrointestinal endoscopy (Olympus Videoscope GIF/Q140; Olympus, Melville, NY), at least two biopsies from fundus, corpus, antrum, and descending duodenum were taken and evaluated by two investigators, unaware of the patient's clinical and laboratory data to minimize interobserver variation. The visual analog scale of the updated Sydney system was used to evaluate inflammation (chronic infiltrate), activity (acute infiltrate), atrophy (glandular loss), intestinal metaplasia, and HP colonization, graded as follows: 0 = absent, 1 = mild, 2 = moderate, and 3 = severe (27). Furthermore, the distribution of lymphocytic infiltration (1 = diffuse, 2 = focal, and 3 = diffuse and focal), degree of lymphocytic destruction of oxyntic glands, and status of oxyntic glands (1 = partial atrophy and 2 = partial atrophy with preserved islets of oxyntic mucosa) (28), and the presence of ECL cells were evaluated (20). Preatrophic autoimmune gastritis includes diffuse lymphocytic infiltration of the lamina propria, focal lymphocyte-mediated destruction of oxyntic glands, and parietal cell pseudohypertrophy (28). Parietal cells were quantified as the percentage of total cells per gland, counted on four sections (fundus/corpus) stained by hematoxylin and eosin, modified Giemsa, and

immunohistochemistry. Twenty glands per biopsy were evaluated (magnification  $\times 390$ ). Twelve sections were counted from each patient, enabling intraobserver variation to be determined. The result per patient represents the mean of these values, and the result of different groups (PCA<sup>+</sup> and PCA<sup>-</sup>) represents an average of these means.

Immunostaining was performed for HP (polyclonal rabbit HP IgG antibodies, dilution 1/200; Dako, Glostrup, Denmark) (35), B-cells (CD20) (L26, M0755, 1/80; Dako), T-cells (CD45RO) (UCHL1, M0742, 1/80; Dako), chromogranin A (DAK-A3, M0869, 1/200; Dako), and H<sup>+</sup>/K<sup>+</sup>ATPase. Antigen retrieval by microwave pretreatment using an EDTA buffer (pH 9) was applied for immunostaining of HP and B- and T-cells. Incubation steps for H<sup>+</sup>/K<sup>+</sup>ATPase immunostaining were as follows: monoclonal mouse H<sup>+</sup>/K<sup>+</sup>ATPase ( $\beta$ -subunit) antibody (IgG1) (Clone 2,611, MA3-923, 1/4,000; Affinity Bioreagents, Golden, CO); biotinylated goat anti-mouse immunoglobulin (E0433, 1/400; Dako), streptavidine-biotinylated horseradish peroxidase (K0377, 100  $\mu\text{l}/\text{coupe}$ , 20'; Dako), and 3,3'-diaminobenzidine tetrahydrochloride (HK 153–5K; BioGene, San Ramon, CA). MA3-923 binds to an epitope within amino acids 1–13 or 15–28 located on the cytoplasmic side of the  $\beta$ -subunit of H<sup>+</sup>/K<sup>+</sup>ATPase and inhibits its enzymatic activity (36).

## Statistical analysis

Results were analyzed using SPSS (SPSS, Chicago, IL). Distributions of continuous data were tested for normality by Kolmogorov-Smirnov test. The unpaired  $t$  test, Mann-Whitney- $U$  test, or ANOVA was used to determine differences between groups. Bonferroni adjustments for multiple comparisons were made. Pearson's or Spearman's rank correlation test was used. Differences in distributions of categorical data were evaluated by  $\chi^2$  or Fisher's exact test. Stepwise forward logistic regression analysis was done to assess the strength and independency of associations. A two-tailed  $P < 0.05$  was considered significant.

**RESULTS**— We biopsied 47 PCA<sup>+</sup> and 41 matched PCA<sup>-</sup> type 1 diabetic patients with a mean age of  $42 \pm 13$  years, a disease duration of  $20 \pm 11$  years, and an HbA<sub>1c</sub> level of  $7.8 \pm 1.1\%$ . ICAs were

Table 1—Clinical and histological features in PCA<sup>+</sup> versus PCA<sup>-</sup> type 1 diabetic patients

|                                                  | PCA <sup>+</sup> | PCA <sup>-</sup> | P         |
|--------------------------------------------------|------------------|------------------|-----------|
| n (M/F)                                          | 47 (26/21)       | 41 (25/16)       | NS        |
| Age (years)                                      | 41 ± 13          | 43 ± 13          | NS        |
| Duration of diabetes (years)                     | 19 ± 12          | 22 ± 10          | NS        |
| GADA <sup>+</sup>                                | 37 (79)          | 23 (56)          | 0.038     |
| H <sup>+</sup> /K <sup>+</sup> ATPase (units/ml) | 234.7 ± 325.3    | 7.9 ± 10.5       | 0.007     |
| HP <sup>+</sup>                                  | 24 (51)          | 23 (56)          | NS        |
| Iron deficiency anemia                           | 15 (32)          | 5 (12)           | 0.04      |
| Pernicious anemia                                | 11 (23)          | 1 (2)            | 0.005     |
| Gastrin (ng/l)                                   | 265 ± 292        | 127 ± 69         | 0.027     |
| Hypergastrinemia (gastrin > 110 ng/l)            | 22 (47)          | 9 (22)           | 0.025     |
| Hypochlorhydria (n tested 42)                    | 11/15            | 5/27             | 0.0008    |
| Maximal acid output (mmol H <sup>+</sup> /h)     | 7.8 ± 7.0        | 16.9 ± 10.4      | 0.004     |
| Autoimmune atrophic gastritis                    | 27 (57)          | 4 (10)           | <0.0001   |
| HP-associated gastritis                          | 10 (21)          | 17 (41)          | NS        |
| Parietal cell mass (%)                           | 20 ± 10          | 29 ± 6           | <0.0001   |
| Corpus atrophy                                   | 1 (0–3)          | 0 (0–2)          | 0.02      |
| Corpus HP                                        | 1 (0–3)          | 0 (0–2)          | NS        |
| Corpus inflammation                              | 1 (0–2)          | 1 (0–2)          | NS        |
| Corpus metaplasia                                | 0 (0–3)          | 0 (0–2)          | NS        |
| Corpus intestinal metaplasia                     | 11 (23)          | 1 (2)            | 0.004     |
| Distribution of lymphocytic infiltration         | 2 (0–3)          | 2 (0–3)          | 0.038     |
| Degree of lymphocytic infiltration               | 2 (0–4)          | 2 (0–3)          | NS        |
| Lymphocytic destruction of glands                | 0 (0–3)          | 0 (0–1)          | NS (0.06) |
| State of the oxyntic glands                      | 0 (0–2)          | 0 (0–1)          | 0.014     |
| State of the intact parietal cells               | 0 (0–1)          | 0 (0–0)          | NS        |
| ECL cell <sup>+</sup>                            | 7 (15)           | 0 (0)            | 0.013     |
| B-cells (counts/mm <sup>2</sup> )                | 1,461 ± 516      | 698 ± 379        | 0.031     |
| T-cells (counts/mm <sup>2</sup> )                | 645 ± 266        | 278 ± 147        | 0.032     |

Data are means ± SD, median (range), or n (%).

positive in 34%, IA2As in 40%, and GADAs in 68%. This group comprised 18 PCA<sup>-</sup> HP<sup>-</sup>, 23 PCA<sup>+</sup> HP<sup>-</sup>, 23 PCA<sup>-</sup> HP<sup>+</sup>, and 24 PCA<sup>+</sup> HP<sup>+</sup> subjects. Intra- and interobserver variations in evaluating histological sections were minimal: 2.4 and 5.1%, respectively.

### PCA status

PCAs were equally common in male and female subjects, and in particular GADA<sup>+</sup> patients were prone to exhibit PCAs (OR 2.9 [1.1–7.4],  $P = 0.038$ ). Iron deficiency anemia (3.4 [1.1–10.3],  $P = 0.04$ ) and pernicious anemia (12.2 [1.5–99.5],  $P = 0.005$ ) were more frequent in PCA<sup>+</sup> than in PCA<sup>-</sup> subjects (Table 1). Women were more prone to have iron deficiency anemia than men (4.6 [1.5–13.5],  $P = 0.005$ ). In the group of 399 patients, from which these 88 were recruited, iron deficiency anemia (21 vs. 9%,  $P = 0.0035$ ) and pernicious anemia (15 vs. 0.3%,  $P < 0.0001$ ) were more prevalent in PCA<sup>+</sup> than in PCA<sup>-</sup> patients. Gastrin

levels were higher ( $P = 0.027$ ) and hypergastrinemia was more common in PCA<sup>+</sup> patients (3.1 [1.2–8.0],  $P = 0.025$ ), but vitamin B12 and folate levels were similar. Basal ( $P = 0.012$ ), maximal ( $P = 0.004$ ), and peak acid output ( $P = 0.011$ ) were lower and hypochlorhydria was more frequent (12.1 [2.7–54.3],  $P = 0.0008$ ) in PCA<sup>+</sup> subjects. Maximal (1.7 ± 2.9 vs. 14.4 ± 10.1 mmol H<sup>+</sup>/h,  $P = 0.048$ ) and peak acid output (2.2 ± 3.8 vs. 21.2 ± 13.7 mmol H<sup>+</sup>/h,  $P = 0.03$ ) were lower in those with than without pernicious anemia.

Autoimmune atrophic gastritis was present in 57% of PCA<sup>+</sup> and 10% of PCA<sup>-</sup> subjects (OR 12.5 [3.8–40.7],  $P < 0.0001$ ). Corpus atrophy was more severe ( $P = 0.02$ ) and there were less parietal cells ( $P < 0.0001$ ) in those with PCA. Interestingly, the percentage of parietal cells in glands correlated inversely with PCA titer ( $r = -0.45$ ,  $P = 0.004$ ) and H<sup>+</sup>/K<sup>+</sup>ATPase antibody level ( $r = -0.51$ ,  $P = 0.001$ ). Signs of preatrophic autoim-

mune gastritis were more frequent in PCA<sup>+</sup> patients, as documented by a more pronounced lymphocytic infiltration in corpus mucosa and partial atrophy of oxyntic glands. Concentrations of B-cells and T-cells were greater in those with PCA, with B-cells predominating. Corpus intestinal meta/dysplasia and ECL cell hyper/dysplasia were more common in PCA<sup>+</sup> patients.

### HP status

HP infection was diagnosed in 47 patients with a similar prevalence in PCA<sup>+</sup> and PCA<sup>-</sup> patients (Table 1). Two-way ANOVA with PCA and HP status as fixed factors showed that HP infection did not influence iron, gastrin, and H<sup>+</sup>/K<sup>+</sup>ATPase antibody levels, parietal cell mass, corpus or antrum atrophy and metaplasia, and ECL cell hyperplasia. Parameters of preatrophic autoimmune gastritis were also similar in HP<sup>+</sup> and HP<sup>-</sup> patients. Antral inflammation ( $P = 0.005$ ) was more pronounced in HP-infected subjects.

### Autoimmune gastritis findings

Stratifying patients according to the presence of AG showed no differences in sex, age, duration of diabetes, HLA-DQ type, or thyroid peroxidase antibody positivity (aTPO) between these two groups (Table 2). However, H<sup>+</sup>/K<sup>+</sup>ATPase antibody ( $P = 0.001$ ) and gastrin levels ( $P = 0.001$ ) were higher in AG<sup>+</sup> patients. Concentrations of gastrin correlated positively with H<sup>+</sup>/K<sup>+</sup>ATPase antibody levels ( $r = 0.73$ ;  $P < 0.0001$ ) and inversely with the percentage of parietal cells per gland ( $r = -0.43$ ,  $P = 0.002$ ). Logistic regression showed that PCA status ( $\beta = 1.44$ ;  $P = 0.04$ ) and gastrin levels ( $\beta = 0.01$ ;  $P = 0.026$ ), but not HP, age, diabetes duration, sex, or HLA-DQ type, were independent risk factors for autoimmune gastritis. Iron deficiency anemia (OR 3.9 [1.4–10.9],  $P = 0.015$ ), pernicious anemia (4.6 [1.3–16.9],  $P = 0.022$ ), and hypochlorhydria (OR 20.0,  $P = 0.0002$ ) were more frequent in the AG<sup>+</sup> group.

There were less parietal cells ( $P < 0.0001$ ) and corpus inflammation ( $P = 0.021$ ) was more severe in patients with autoimmune gastritis. Concentrations of B-cells ( $P = 0.03$ ) were higher in those with autoimmune gastritis. Antral morphology was similar between the two groups. Corpus intestinal metaplasia was present in 11 AG<sup>+</sup> patients, including one PCA<sup>+</sup> patient with linitis plastica, com-



**Table 2—Comparison of clinical and histological features in type 1 diabetic patients with and without autoimmune gastritis**

|                                                  | Autoimmune gastritis | No autoimmune gastritis | P       |
|--------------------------------------------------|----------------------|-------------------------|---------|
| n (M/F)                                          | 31 (16/15)           | 57 (34/23)              | NS      |
| Age (years)                                      | 44 ± 12              | 41 ± 13                 | NS      |
| Duration of diabetes (years)                     | 20 ± 12              | 20 ± 11                 | NS      |
| aTPO <sup>+</sup>                                | 10 (32)              | 16 (28)                 | NS      |
| PCA <sup>+</sup>                                 | 27 (87)              | 20 (35)                 | <0.0001 |
| H <sup>+</sup> /K <sup>+</sup> ATPase (units/ml) | 154.6 ± 121.0        | 21.5 ± 36.2             | 0.001   |
| HP <sup>+</sup>                                  | 13 (42)              | 34 (60)                 | NS      |
| Gastrin (ng/l)                                   | 333 ± 335            | 131 ± 88                | 0.001   |
| Vitamin B12 (pmol/l)                             | 319 ± 229            | 376 ± 182               | NS      |
| Red blood cell folic acid (nmol/l)               | 923 ± 417            | 1008 ± 369              | NS      |
| Iron deficiency anemia                           | 12 (39)              | 8 (14)                  | 0.015   |
| Pernicious anemia                                | 8 (26)               | 4 (7)                   | 0.022   |
| Hypochlorhydria (n tested 42)                    | 10/12                | 6/30                    | 0.0002  |
| Maximal acid output (mmol H <sup>+</sup> /h)     | 4.1 ± 3.6            | 14.3 ± 10.2             | 0.001   |
| Parietal cell mass (%)                           | 15 ± 8               | 29 ± 4                  | <0.0001 |
| Corpus atrophy                                   | 1 (0–3)              | 0 (0–1)                 | <0.0001 |
| Corpus HP                                        | 0 (0–1)              | 0 (0–3)                 | 0.018   |
| Corpus inflammation                              | 1 (1–2)              | 1 (0–2)                 | 0.021   |
| Corpus metaplasia                                | 0 (0–3)              | 0 (0–1)                 | 0.013   |
| Corpus metaplasia                                | 11 (35)              | 1 (2)                   | <0.0001 |
| ECL cell <sup>+</sup>                            | 7 (23)               | 0 (0)                   | 0.0004  |
| B-cell (counts/mm <sup>2</sup> )                 | 1,595 ± 525          | 834 ± 418               | 0.03    |
| T-cell (counts/mm <sup>2</sup> )                 | 639 ± 259            | 395 ± 202               | NS      |

Data are means ± SD, median (range), or n (%).

pared with one AG<sup>-</sup> subject (OR 30.8 [3.7–254.1],  $P < 0.0001$ ). ECL cell hyperplasia was found in seven PCA<sup>+</sup> patients with autoimmune gastritis, of whom one showed a carcinoid tumor, but in no PCA<sup>-</sup> subjects. Six of seven patients with ECL hyperplasia presented with hypergastrinemia (13.4 [1.5–117.6],  $P = 0.007$ ). A combination of corpus intestinal metaplasia and ECL cell hyperplasia was present in six PCA<sup>+</sup> patients with autoimmune gastritis. Thus, (pre)malignant lesions were found in 12 of 47 (26%) PCA<sup>+</sup> and 39% of PCA<sup>+</sup> type 1 diabetic patients with autoimmune gastritis.

**CONCLUSIONS**— Type 1 diabetic, particularly GADA<sup>+</sup> (5), patients have a high prevalence of PCA. PCA positivity and hypergastrinemia were risk factors for autoimmune gastritis. PCA<sup>+</sup> subjects are prone to develop iron deficiency anemia, pernicious anemia, autoimmune gastritis, intestinal metaplasia, and ECL hyperplasia.

#### PCAs, gastric acid production, and anemia

PCAs target gastric H<sup>+</sup>/K<sup>+</sup>ATPase. We and others (6,35) have showed that acid

output was lower in PCA<sup>+</sup> patients and that fasting pH correlated with iron levels, supporting evidence that hypochlorhydria may impair iron absorption and cause iron deficiency anemia (11). Gastrin levels were higher in our PCA<sup>+</sup> patients and correlated with H<sup>+</sup>/K<sup>+</sup>ATPase antibody levels and inversely with the percentage of parietal cells. Others (12,37,38) noted that gastrin levels correlated with peak acid output and corpus atrophy.

Pernicious anemia, present in 2.6–4% of type 1 diabetic subjects (3,16), was 10 times more common in our PCA<sup>+</sup> than PCA<sup>-</sup> patients. PCA and AIF may impair vitamin B12 absorption and cause pernicious anemia, which appears in later stages of autoimmune gastritis (39). Pernicious anemia affects both sexes equally (3,15,16).

#### Histological findings and pathogenetic considerations

PCA<sup>+</sup> subjects had a higher prevalence of autoimmune gastritis with (2,3,9) or without (28) total atrophy, higher mucosal B- and T-cell concentrations with B-cells predominating (9,40), and less pari-

etal cells in oxyntic glands (20 vs. 29%) than PCA<sup>-</sup> patients. In normal stomachs parietal cells occupy 28–34% of oxyntic glands (30).

We confirmed a correlation between PCA titer and the severity of corpus atrophy (38). This suggests that humoral mechanisms involving cytotoxic autoantibodies play a role in mediating mucosal damage in autoimmune gastritis (9,41). PCA can lyse parietal cells in vitro (41), but it is unlikely that they are pathogenic in vivo, because gastric H<sup>+</sup>/K<sup>+</sup>ATPase is not accessible to circulating autoantibodies (10). However, PCA in gastric secretions might have direct access to the apical surface of parietal cells (6). Recently, CD4<sup>+</sup> T-cells recognizing H<sup>+</sup>/K<sup>+</sup>ATPase were suggested to mediate autoimmune gastritis (10). Burman et al. (42) observed that T-cells predominated in autoimmune gastritis. Moreover, not every patient with autoimmune gastritis has PCA. Possible explanations for seronegative cases are exhaustion of the autoimmune response as the parietal cell autoantigens are depleted (43), an immunological reaction restricted to a cellular response, unrecognized autoantibodies, and the development of autoimmune gastritis before the development of PCAs (9).

At least four biopsies were studied to document autoimmune gastritis, thereby reducing sampling error. Autoimmune gastritis (57%) and (pre)malignant gastric lesions (26%) were frequent in our PCA<sup>+</sup> subjects. Results are based on a representative number of PCA<sup>+</sup> and matched PCA<sup>-</sup> patients. Not all eligible patients agreed to undergo gastroscopy, and this might, however, have introduced some bias. We estimate that at least one-third of all PCA<sup>+</sup> type 1 diabetic patients have autoimmune gastritis. Its prevalence in the total diabetic population would be 5–10%. Nearly 40% of our PCA<sup>+</sup> patients with autoimmune gastritis exhibited (pre)malignant gastric lesions; 11 patients had intestinal metaplasia, comprising 1 with an adenocarcinoma, and 7 showed ECL cell hyperplasia, including 1 subject with a gastric carcinoid tumor. The prevalence of gastric carcinoid tumors, developing on a background of ECL cell hyperplasia induced by chronic hypergastrinemia, ranges from 4–7% in patients with autoimmune gastritis/pernicious anemia and is 13 times more prevalent than in control subjects (17,19,20). Autoimmune gastritis with

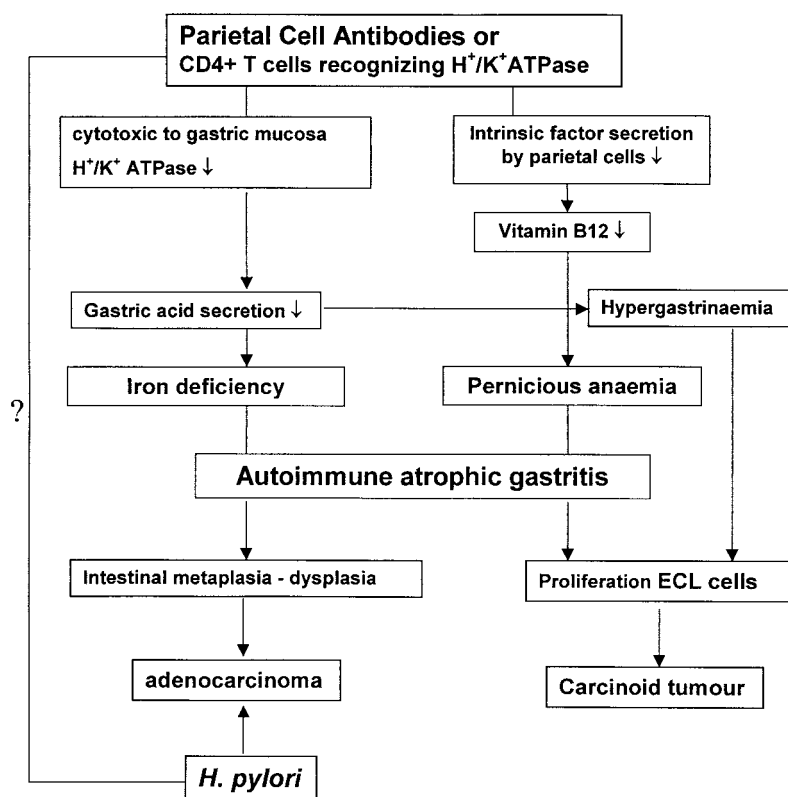

**Figure 1**—Schematic presentation of manifestations of autoimmune gastropathy. Pathogenetic considerations and a possible role of PCA are discussed in the CONCLUSIONS section.

hypo/achlorhydria may not only result in hypergastrinemia but also in overgrowth of bacteria producing mutagenic *N*-nitroso compounds, which can lead to intestinal metaplasia-dysplasia, precancerous conditions (44). Patients with atrophic gastritis/pernicious anemia have a three- to fivefold increased gastric cancer risk, ranging from 1 to 9% (17,18), although this has not been shown in all studies (23).

### HP infection

Longitudinal studies suggest that *HP* may induce early stages of autoimmune gastritis by stimulating granulocytes to produce autodestructive oxygen radicals, which are mutagenic and ultimately lead to corpus atrophy (45) and *HP* self-destruction due to intestinal metaplasia or achlorhydria (46). Models for the pathogenesis of *HP*-associated autoimmunity are molecular mimicry and/or T-helper 1-induced expression of HLA class II and costimulatory molecules on gastric epithelial cells (24–26). However, we and others (35,46,47) have found no or a negative relation between *HP* infection and auto-

immune gastritis. Nevertheless, eradicating *HP* and doing a rebiopsy 6 months later to note its effect on histology is recommended.

### Management proposal

Manifestations of autoimmune gastropathy (Fig. 1) are sufficiently prevalent, and the benefits of early diagnosis and treatment (supplementation of iron or vitamin B12 or removal of [pre]malignant gastric lesions) are such that all type 1 diabetic patients should be screened. It seems prudent to test PCA status at onset of diabetes and then yearly for 3 years, then at 5 years and 5-yearly thereafter, or at any time if there are clinical indications, because the test may later become positive (43). At yearly intervals gastrin, iron, vitamin B12 levels, and a complete blood count should be performed. We also suggest performing at least once endoscopy with biopsy in PCA<sup>+</sup> patients, particularly in those with high gastrin levels. Patients with mild to moderate mucosal dysplasia should be followed endoscopically every 5 years (17). Polyps should be removed, and adenocarcinoma should be excised. Gastric

carcinoid tumors are rare and have a far better outcome than carcinoma. Endoscopic surveillance at 5-year intervals has been proposed for ECL hyperplasia (19). For gastric carcinoid tumors associated with autoimmune gastritis, <1 cm and/or fewer than three, expectant therapy or endoscopic removal of accessible tumors is proposed (48). Alternative options include antrectomy (49) and treatment by octreotide (50).

### Conclusions

PCA<sup>+</sup> type 1 diabetic patients are at increased risk for iron deficiency anemia, pernicious anemia, hypochlorhydria, autoimmune gastritis, and (pre)malignant gastric lesions. Therefore, all PCA<sup>+</sup> patients should be thoroughly examined, particularly those with hypergastrinemia, and gastroscopy with biopsies should be performed.

**Acknowledgments**—This study was partly presented at the 36th Annual Meeting of the European Association for the Study of Diabetes, Jerusalem, 17–21 September 2000 and supported by a grant from the European Foundation for the Study of Diabetes.

We thank Dr. F. Peiffer and Dr. G. Moorkens (Department of Endocrinology-Diabetology and Internal Medicine) who contributed to the recruitment of patients. We gratefully acknowledge Dr. C. Van Campenhout and K. Van Cotthem (laboratory of Immunology and Protein Chemistry), the technical staff of the laboratory of Pathology, D. Callens (laboratory of Gastroenterology), Apr. M. Martin (laboratory of Hormonology), and Dr. B. Manuel y Keenoy, J. Vertommen, P. Aerts, S. Schrans, and M. Vinckx (laboratory of Endocrinology-Diabetology) of the University of Antwerp.

### References

1. Eisenbarth GS: Type 1 diabetes mellitus: a chronic autoimmune disease. *N Engl J Med* 314:1360–1368, 1986
2. Riley WJ, Toskes PP, Maclaren NK, Silverstein JH: Predictive value of gastric parietal cell autoantibodies as a marker for gastric and hematologic abnormalities associated with insulin-dependent diabetes. *Diabetes* 31:1051–1055, 1982
3. De Block C, Van Gaal L, De Leeuw I, the Belgian Diabetes Registry: High prevalence of manifestations of gastric autoimmunity in parietal cell-antibody positive type 1 (insulin-dependent) diabetic patients. *J Clin Endocrinol Metab* 84:4062–4067, 1999
4. De Block CEM, De Leeuw IH, Decochez

- K, Winnock F, Van Campenhout CM, Martin M, Gorus FK, Belgian Diabetes Registry: The presence of thyrogastic antibodies in first-degree relatives of type 1 diabetic patients is associated with age and proband antibody status. *J Clin Endocrinol Metab* 86:4358–4363, 2001
5. De Block CEM, De Leeuw IH, Rooman RPA, Winnock F, Du Caju MVL, Van Gaal LF, the Belgian Diabetes Registry: Gastric parietal cell antibodies are associated with glutamic acid decarboxylase-65 antibodies and the HLA DQA1\*0501-DQB1\*0301 haplotype in type 1 diabetes. *Diabet Med* 17:618–622, 2000
  6. Karlsson FA, Burman P, Lödf L, Olsson M, Scheynius A, Mardh S: Enzyme-linked immunosorbent assay of H<sup>+</sup>/K<sup>+</sup>-ATPase, the parietal cell antigen. *Clin Exp Immunol* 70:604–610, 1987
  7. Gleeson PA, Toh BH: Molecular targets in pernicious anemia. *Immunol Today* 12:233–238, 1991
  8. Strickland RG, Mackay IR: A reappraisal and significance of chronic atrophic gastritis. *Dig Dis* 18:426–440, 1973
  9. Kaye MD, Whorwell PJ, Wright R: Gastric mucosal lymphocyte subpopulations in pernicious anemia and in normal stomach. *Clin Immunol Immunopathol* 28:431–440, 1983
  10. Toh BH, Sentry JW, Alderuccio F: The causative H<sup>+</sup>/K<sup>+</sup>ATPase antigen in the pathogenesis of autoimmune gastritis. *Immunol Today* 21:348–354, 2000
  11. Schade SS, Cohen RJ, Conrad ME: The effect of hydrochloric acid on iron absorption. *N Engl J Med* 279:672–674, 1968
  12. Trudeau WL, McGuigan JE: Relations between serum gastrin levels and rates of gastric hydrochloric acid secretion. *N Engl J Med* 284:408–412, 1971
  13. De Block CEM, Van Campenhout CM, De Leeuw IH, Manuel y Keenoy B, Martin M, Van Hoof V, Van Gaal LF: Soluble transferrin receptor level: a new marker of iron deficiency anemia, a common manifestation of gastric autoimmunity in type 1 diabetes. *Diabetes Care* 23:1384–1388, 2000
  14. Marignani M, Delle Fave G, Mecarocci S, Bordi C, Angeletti S, D'Ambra G, Aprile MR, Corleto VD, Monarca B, Annibale B: High prevalence of atrophic body gastritis in patients with unexplained microcytic and macrocytic anemia. *Am J Gastroenterol* 94:766–772, 1999
  15. Toh BH, Van Driel IR, Gleeson PA: Pernicious anemia. *N Engl J Med* 337:1441–1448, 1997
  16. Ungar B, Stocks AE, Whittingham S, Martin FIR, Mackay IR: Intrinsic-factor antibody, parietal-cell antibody, and latent pernicious anemia in diabetes mellitus. *Lancet* 2:415–417, 1968
  17. Armbrecht U, Stockbrügger RW, Rode J, Menon GG, Cotton PB: Development of gastric dysplasia in pernicious anemia: a clinical and endoscopic follow-up study of 80 patients. *Gut* 31:1105–1109, 1990
  18. Hsing AW, Hansson LE, McLaughlin JK, Nyren O, Blot WJ, Ekbom A, Fraumeni JF Jr: Pernicious anemia and subsequent cancer: a population-based cohort study. *Cancer* 71:745–750, 1993
  19. Kokkola A, Sjöblom SM, Haapiainen R, Sipponen P, Puolakkainen P, Järvinen H: The risk of gastric carcinoma and carcinoid tumors in patients with pernicious anemia: a prospective follow-up study. *Scand J Gastroenterol* 33:88–92, 1998
  20. Solcia E, Fiocca T, Villani L, Gianatti A, Cornaggia M, Chiaravalli A, Curzio M, Capella C: Morphology and pathogenesis of endocrine hyperplasias, precarcinoid lesions, and carcinoids arising in chronic atrophic gastritis. *Scand J Gastroenterol* 26 (Suppl. 180):146–159, 1991
  21. Borch K, Renvall H, Liedberg G: Gastric endocrine cell hyperplasia and carcinoid tumors in pernicious anemia. *Gastroenterology* 88:638–648, 1985
  22. De Block CEM, De Leeuw IH, Pelckmans PA, Michielsens PP, Bogers JJPM, Van Marck EAE, Van Gaal LF: Autoimmune hepatitis, autoimmune gastritis, and gastric carcinoid in a type 1 diabetic patient: a case report. *J Diabetes Complications* 14:116–120, 2000
  23. Schafer LW, Larson DE, Melton LJ III, Higgins JA, Zinsmeister AR: Risk of development of gastric carcinoma in patients with pernicious anemia: a population-based study in Rochester, Minnesota. *Mayo Clin Proc* 60:444–448, 1985
  24. Negrini R, Savio A, Graffeo M, Rolfi F, Ghielmi S: Autoantibodies and gastric *Helicobacter pylori* infection. Does autoimmunity affect progression to atrophic gastritis. *Eur J Gastroenterol Hepatol* 5 (Suppl. 2):S27–S29, 1993
  25. Ma JY, Borch K, Sjöstrand SE, Janzon L, Mardh S: Positive correlation between H, K-Adenosine Triphosphatase autoantibodies and *Helicobacter pylori* antibodies in patients with pernicious anemia. *Scand J Gastroenterol* 29:961–965, 1994
  26. Appelmelk BJ, Faller G, Claeys D, Kirchner T, Vandenbroucke-Grauls CMJE: Bugs on trial: the case of *Helicobacter pylori* and autoimmunity. *Immunol Today* 19:296–299, 1998
  27. Dixon MF, Genta RM, Yardley JH, Correa P: Classification and grading of gastritis: the updated Sydney System: International Workshop on the Histopathology of Gastritis, Houston 1994. *Am J Surg Pathol* 20:1161–1181, 1996
  28. Stolte M, Baumann K, Bethke B, Ritter M, Lauer E, Eidt H: Active autoimmune gastritis without total atrophy of the glands. *Z Gastroenterol* 30:729–735, 1992
  29. Card WI, Marks IN: The relationship between the acid output of the stomach following “maximal” histamine stimulation and the parietal cell mass. *Clin Sci* 19:147–163, 1960
  30. Hogben CAM, Kent TH, Woodward PA, Sill AJ: Quantitative histology of the gastric mucosa: man, dog, cat, guinea pig, and frog. *Gastroenterology* 67:1143–1154, 1974
  31. The Expert Committee on the Diagnosis and Classification of Diabetes Mellitus: Report of the Expert Committee on the Diagnosis and Classification of Diabetes Mellitus. *Diabetes Care* 20:1183–1197, 1997
  32. Vandewalle CL, Falorni A, Lernmark A, Goubert P, Dorchy H, Coucke W, Semakula C, Van der Auwera B, Kaufman L, Schuit F, Pipeleers DG, Gorus FK, Belgian Diabetes Registry: Associations of GAD65 and IA-2 autoantibodies with genetic risk markers in new-onset IDDM patients and their siblings. *Diabetes Care* 20:1547–1552, 1997
  33. Heimberg H, Nagy ZP, Somers G, De Leeuw I, Schuit FC: Complementation of HLA DQA and -DQB genes confers susceptibility and protection to insulin-dependent diabetes mellitus. *Human Immunology* 33:10–17, 1992
  34. Peeters M, Ghoos Y, Geypens B, Rutgeerts P: Breath tests in *Helicobacter pylori* infection: methodological aspects. *J Physiol Pharmacol* 48 (Suppl. 4):67–73, 1997
  35. De Block CEM, De Leeuw IH, Bogers JJPM, Pelckmans PA, Ieven M, Van Marck EAE, Van Hoof V, Măday E, Van Acker KL, Van Gaal LF: *Helicobacter pylori*, parietal cell antibodies and autoimmune gastropathy in type 1 diabetes mellitus. *Aliment Pharmacol Therap* 16:281–289, 2002
  36. Chow DC, Forte JG: Characterization of the β-subunit of the H<sup>+</sup>/K<sup>+</sup>ATPase using an inhibitory monoclonal antibody. *Am J Physiol* 265:C1562–C1570, 1993
  37. Kokkonen J: Parietal cell antibodies and gastric secretion in children with diabetes mellitus. *Acta Paediatr Scand* 69:485–489, 1980
  38. Sipponen P, Valle J, Varis K, Kekki M, Ihamäki T, Siurala M: Fasting levels of serum gastrin in different functional and morphologic states of the antropfundal mucosa: an analysis of 860 subjects. *Scand J Gastroenterol* 25:513–519, 1990
  39. Irvine WJ, Cullen DR, Mawhinney H: Natural history of autoimmune achlorhydric atrophic gastritis. *Lancet* 2:482–485, 1974
  40. Baur S, Fisher JM, Strickland RG, Taylor KB: Autoantibody-containing cells in the gastric mucosa in pernicious anemia. *Lancet* 2:887–890, 1968
  41. Loveridge N, Bitensky L, Chayen J, Hausamen TU, Fisher JM, Taylor KB,

- Gardner JD, Bottazzo GF, Doniach D: Inhibition of parietal cell function by human gammaglobulin containing gastric parietal cell antibodies. *Clin Exp Immunol* 41:264–270, 1980
42. Burman P, Kämpe O, Kraaz W, Loof L, Smolka A, Karlsson A, Karlsson-Parra A: A study of autoimmune gastritis in the postpartum period and at a 5-year follow-up. *Gastroenterology* 103:934–942, 1992
43. Davidson RJL, Atrah HI, Sewell HF: Longitudinal study of circulating gastric antibodies in pernicious anemia. *J Clin Pathol* 42:1092–1095, 1989
44. Correa P: Human gastric carcinogenesis: a multistep and multifactorial process. *Cancer Res* 52:6735–6740, 1992
45. Valle J, Kekki M, Sipponen P, Ihamaki T, Siurala M: Long-term course and consequences of *Helicobacter pylori* gastritis: results of a 32-year follow-up study. *Scand J Gastroenterol* 31:546–550, 1996
46. Fong TL, Dooley CP, Dehesa M, Cohen H, Grunel R, Fitzgibbons PL, Perez-Perez GI, Blaser MJ: *Helicobacter pylori* infection in pernicious anemia: a prospective controlled study. *Gastroenterology* 100:328–332, 1991
47. Annibale B, Marignani M, Azzoni C, D'Ambra G, Caruana P, D'Adda T, Delle Fave G, Bordi C: Atrophic body gastritis: distinct features associated with *Helicobacter pylori* infection. *Helicobacter* 2:57–64, 1997
48. Gilligan CJ, Lawton G, Tang L, West A, Modlin I: Gastric carcinoid tumors: the biology and therapy of an enigmatic and controversial lesion. *Am J Gastroenterol* 3:338–352, 1995
49. Hirschowitz BI, Griffith J, Pellegrin D, Cummings OW: Rapid regression of enterochromaffinlike cell gastric carcinoids in pernicious anemia after antrectomy. *Gastroenterology* 102:1409–1418, 1992
50. Ferraro G, Annibale B, Marignani M, Azzoni C, D'Adda T, D'Ambra G, Bordi C, Delle Fave G: Effectiveness of octreotide in controlling fasting hypergastrinemia and related enterochromaffin-like cell growth. *J Clin Endocrinol Metab* 81:677–683, 1996
